# Supplementary material for: Detection of Genes Encoding Microbial Surface Component Recognizing Adhesive Matrix Molecules in Methicillin-Resistant Staphylococcus aureus Isolated from Pyoderma Patients
Source: MDPI journal article supplement (doi:10.3390/genes14040783), 2023-03-24
Supplement: s1 [file s1]

# Supplementary File

**Table S1** Detail of Primers.

| S. No | Name of primer | Primer direction | Sequence                         | Size of product (bp) |
|-------|----------------|------------------|----------------------------------|----------------------|
| 1.    | <i>mec A</i>   | Forward          | 5'TGCTATCCACCCTCAAACAGG3'        | 286                  |
|       |                | Reverse          | 5'AACGTTGTAACCACCCCAAGA3'        |                      |
| 2.    | <i>fem A</i>   | Forward          | 5'TGCTATCCACCCTCAAACAGG3'        | 450                  |
|       |                | Reverse          | 5'AACGTTGTAACCACCCCAAGA3'        |                      |
| 3.    | <i>bbp</i>     | Forward          | 5'AACTACATCTAGTACTCAACAACAG3'    | 575                  |
|       |                | Reverse          | 5'ATGTGCTTGAATAACACCATCATCT3'    |                      |
| 4.    | <i>cna</i>     | Forward          | 5'GTCAAGCAGTTATTAACACCAGAC3'     | 423                  |
|       |                | Reverse          | 5'AATCAGTAATTGCACTTTGTCCACTG3'   |                      |
| 5.    | <i>eno</i>     | Forward          | 5'ACGTGCAGCAGCTGACT3'            | 302                  |
|       |                | Reverse          | 5'CAACAGCATYCTTCAGTACCTTC3'      |                      |
| 6.    | <i>fnbA</i>    | Forward          | 5'GTGAAGTTTTAGAAGGTGGAAAGATTAG3' | 643                  |
|       |                | Reverse          | 5'GCTCTTGTAAGACCATTTTTCTTCAC3'   |                      |
| 7.    | <i>fnbB</i>    | Forward          | 5'GTAACAGCTAATGGTCGAATTGATACT3'  | 524                  |
|       |                | Reverse          | 5'CAAGTTCGATAGGAGTACTATGTTC3'    |                      |
| 8.    | <i>fib</i>     | Forward          | 5'CTACAACTACAATTGCCGTCAACAG3'    | 404                  |
|       |                | Reverse          | 5'GCTCTTGTAAGACCATTTTTCTTCAC3'   |                      |
| 9.    | <i>clfA</i>    | Forward          | 5'ATTGGCGTGGCTTCAGTGCT3'         | 292                  |
|       |                | Reverse          | 5'CGTTTCTTCCGTAGTTGCATTTG3'      |                      |

**Table S2.** Conditions for amplification of genes.

| Gene                      | PCR conditions  |                |                |                |                 |         | No. of cycles |
|---------------------------|-----------------|----------------|----------------|----------------|-----------------|---------|---------------|
|                           | Hot start       | Denaturation   | Annealing      | Elongation     | Extension       | Storage |               |
| <i>mecA</i>               | 97°C for 6 min  | 92°C for 30 s  | 55°C for 30 s  | 72°C for 45 s  | 72°C for 10 min | 4°C     | 30            |
| <i>femA</i>               | 94°C for 5 min  | 94°C for 30 s  | 55°C for 40 s  | 72°C for 50 s  | 72°C for 10 min | 4°C     | 40            |
| MSC<br>RAM<br>Ms<br>genes | 94 °C for 5 min | 94°C for 1 min | 55°C for 1 min | 72°C for 1 min | 72°C for 10 min | 4°C     | 25            |
